# Supplementary material for: Cell-penetrating peptide (CPP)-conjugated proteins is an efficient tool for manipulation of human mesenchymal stromal cells
Source: PubMed Central journal article supplement (PMC3953728; doi:10.1038/srep04378), 2014-03-14
Supplement: srep04378-s1.pdf [file srep04378-s1.pdf]

1 **Title: Cell-penetrating peptide (CPP)-conjugated proteins is an efficient tool for**  
2 **manipulation of human mesenchymal stromal cells**

3  
4 *Names of authors:*

5 **Junghyun Jo<sup>a,1</sup>, Soomin Hong<sup>a,1</sup>, Won Yun Choi<sup>b,c</sup>, and Dong Ryul Lee<sup>a,b,d,\*</sup>**

6  
7 *Affiliations of authors:*

8 <sup>a</sup> Department of Biomedical Science, College of Life Science, CHA University, Seoul, Korea

9 <sup>b</sup> Fertility Center, CHA Gangnam Medical Center, College of Medicine, CHA University, Seoul,  
10 Korea

11 <sup>c</sup> Department of Biotechnology, Seoul Women's University, Seoul, Korea

12 <sup>d</sup> CHA Stem Cell Institute, CHA University, Seoul, Korea

13  
14 <sup>1</sup> These authors contributed equally to this study.

15  
16  
17 <sup>\*</sup> *To whom correspondence may be addressed: Dong Ryul Lee, Ph.D.,* Department of Biomedical  
18 Science, College of Life Science, CHA University, 606-13 Yeoksam-dong, Gangnam-gu, Seoul 135-  
19 081 Korea. Tel: 82-2-3468-3421; E-mail: [drleedr@cha.ac.kr](mailto:drleedr@cha.ac.kr)

20  
21

## **SUPPLEMENTARY MATERIALS AND METHODS**

### **Cumulative population doubling number assay**

The population doubling (PD) number was calculated at every subculture with the formula  $2^X = N_H/N_I$ .  $N_I$  is the seeded cell number,  $N_H$  is the harvested cell number at 80% of confluence, and  $X$  is population doubling. Each PD number was added to the previous PD number to yield cumulative population doubling number.

### **Flow cytometric analysis**

To identify of hBMSCs and hTSCs characteristics, flow cytometric analysis was performed. hBMSCs and hTSCs were dissociated to single cells by treatment of 0.05% Trypsin-EDTA (Hyclone) for 3 min. Each group of cells was fixed with 4% paraformaldehyde (PFA) for 10 min and treated with appropriate antibodies. Fixed hBMSCs were incubated with primary antibodies, CD34, CD45, CD73, CD90, CD105, HLA-DR, SSEA4 (BD), and c-Kit (Santa Cruz Biotechnology) for 20 min at 4°C in the dark. hTSCs were treated with CD14, CD29, CD31, CD34, CD44, CD45, CD73, CD90, CD105, CD140 (BD), CD133 (eBioscience, Inc.), CD166, HLA-ABC, HLA-DR, TRA-1-60, SSEA3, TRA-1-81 (BD), and c-Kit (Santa Cruz Biotechnology) for 20 min at 4°C in the dark. Then, cells were washed three times with  $Ca^{2+}$ ,  $Mg^{2+}$ -free PBS (Hyclone). Cells then washed twice with PBS (Hyclone) and suspended in fluorescence-activated cell sorting (FACS) buffer (1x PBS with 2% FBS), and filtered through 5 ml polystyrene round-bottom tube with a cell-strainer cap (12x75 mm style, BD Bioscience). Flow cytometric analysis was performed using a FACS Calibur Flow Cytometer (FACS Vantage SE System; BD) and Cell Quest Pro software (BD Bioscience).

### **In vitro differentiation for adipogenic, chondrogenic, and osteogenic cells**

To analyze hBMSCs and hTSCs differentiation potential into mesodermal-lineage cells, in vitro differentiation was performed. hBMSCs and hTSCs were plated onto 6-well culture dishes and maintained with growth medium until 80% of confluence. Then, cells were induced to differentiate by replacement of medium with adipogenic, chondrogenic, and osteogenic differentiation medium (Invitrogen) and grown in these medium for 21 days. Differentiated adipogenic cells were fixed with 10% formalin for 30 min at room temperature (RT) and then washed with distilled water. Adipogenic differentiation was visualized using Oil Red O (Sigma-Aldrich) staining and cells were stained with an oil red O working solution for 15 min at RT. Differentiated chondrocytes were fixed with 4% PFA for 30 min at RT. To visualize the chondrocytes, we used 1% Alcian Blue (Sigma-Aldrich) in 0.1 N HCl. Differentiated osteogenic cells were fixed with 4% PFA for 30 min at RT, and stained with 2% Alizarin Red (Sigma-Aldrich). Also, all three types of differentiated cells were harvested and total RNA was extracted to perform real-time PCR. The expression of adipogenesis-specific markers,

58 *C/EBP $\alpha$*  and *PPAR $\gamma$* , were analyzed, and chondrogenesis-specific markers such as *COMP* and *SOX9*  
59 were examined. To measured osteogenesis-specific markers expression, we used *COL-1* and *RUNX2*.

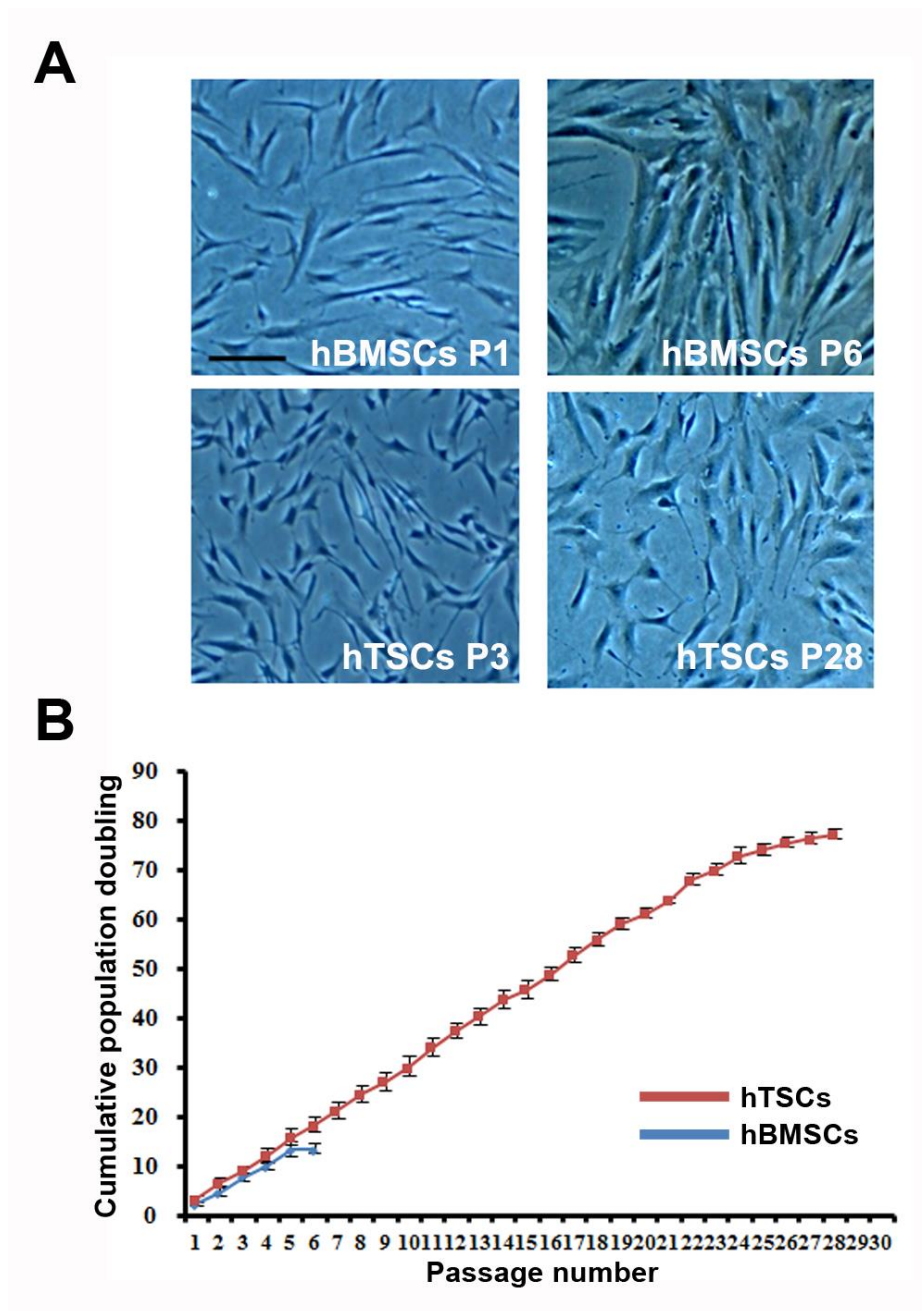

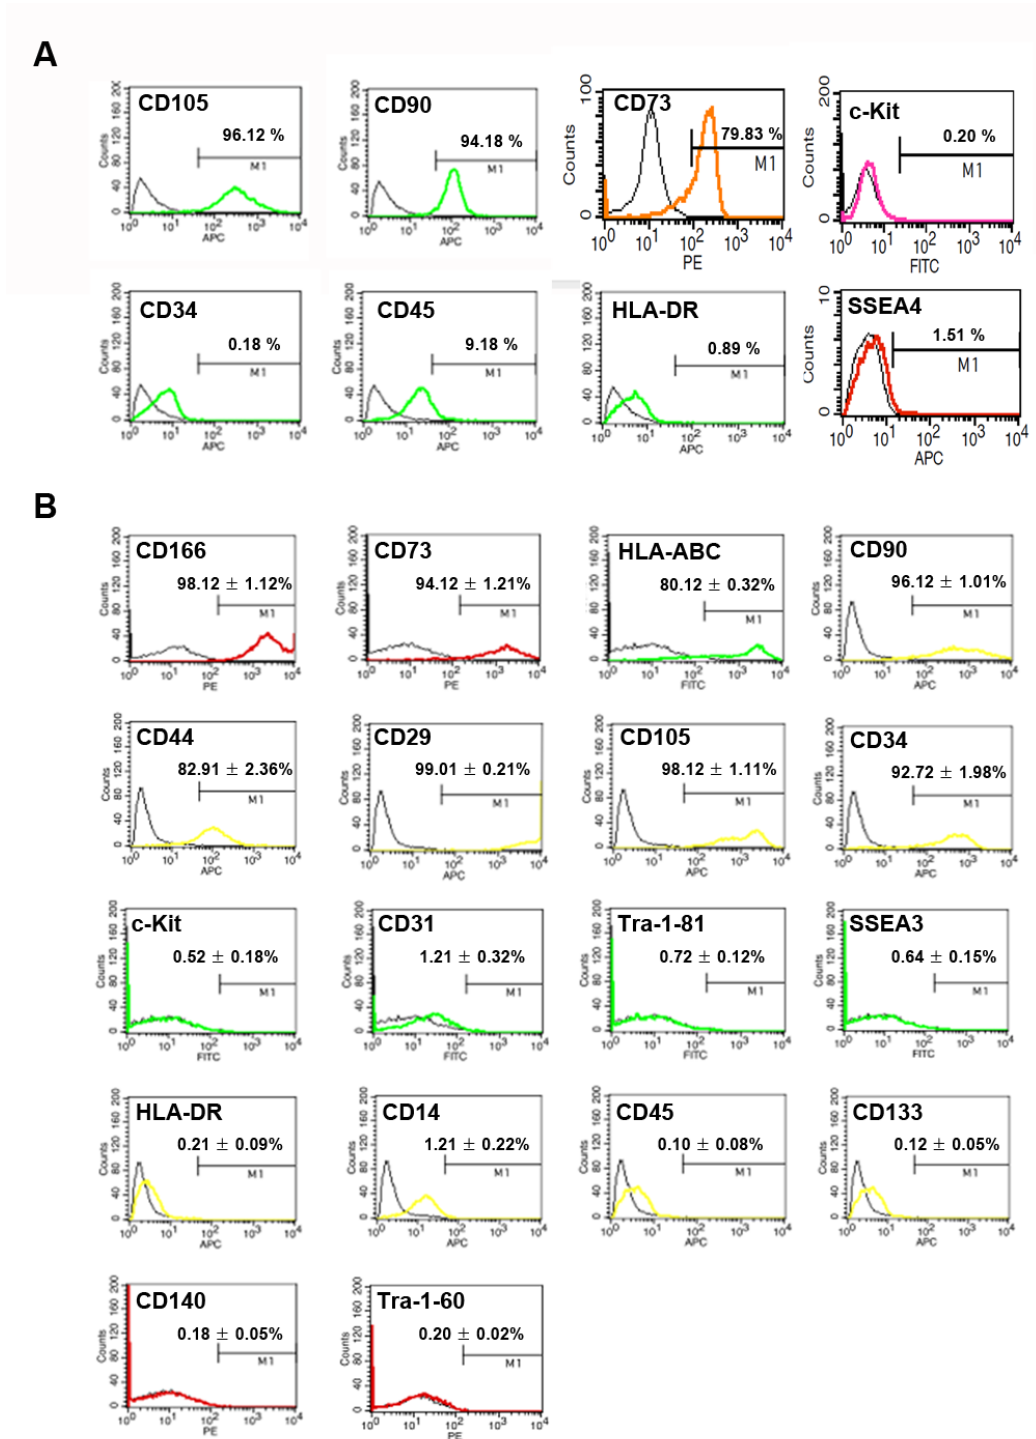

71

72 **Supplementary Figure 2. Characterization of hBMSCs and hTSCs by flow cytometric analysis.**

73 (A) hBMSCs showed positive for CD105, CD90, CD73, and c-Kit, but negative for CD34,

74 CD45, HLA-DR, and SSEA4. (B) hTSCs expressed CD166, CD73, HLA-ABC, CD90,

75 CD44, CD29, CD105, and CD34. But c-Kit, CD21, Tra-1-81, SSEA3, HLA-DR, CD14,

76 CD45, CD133, CD140, and Tra-1-60 was not detected.

77

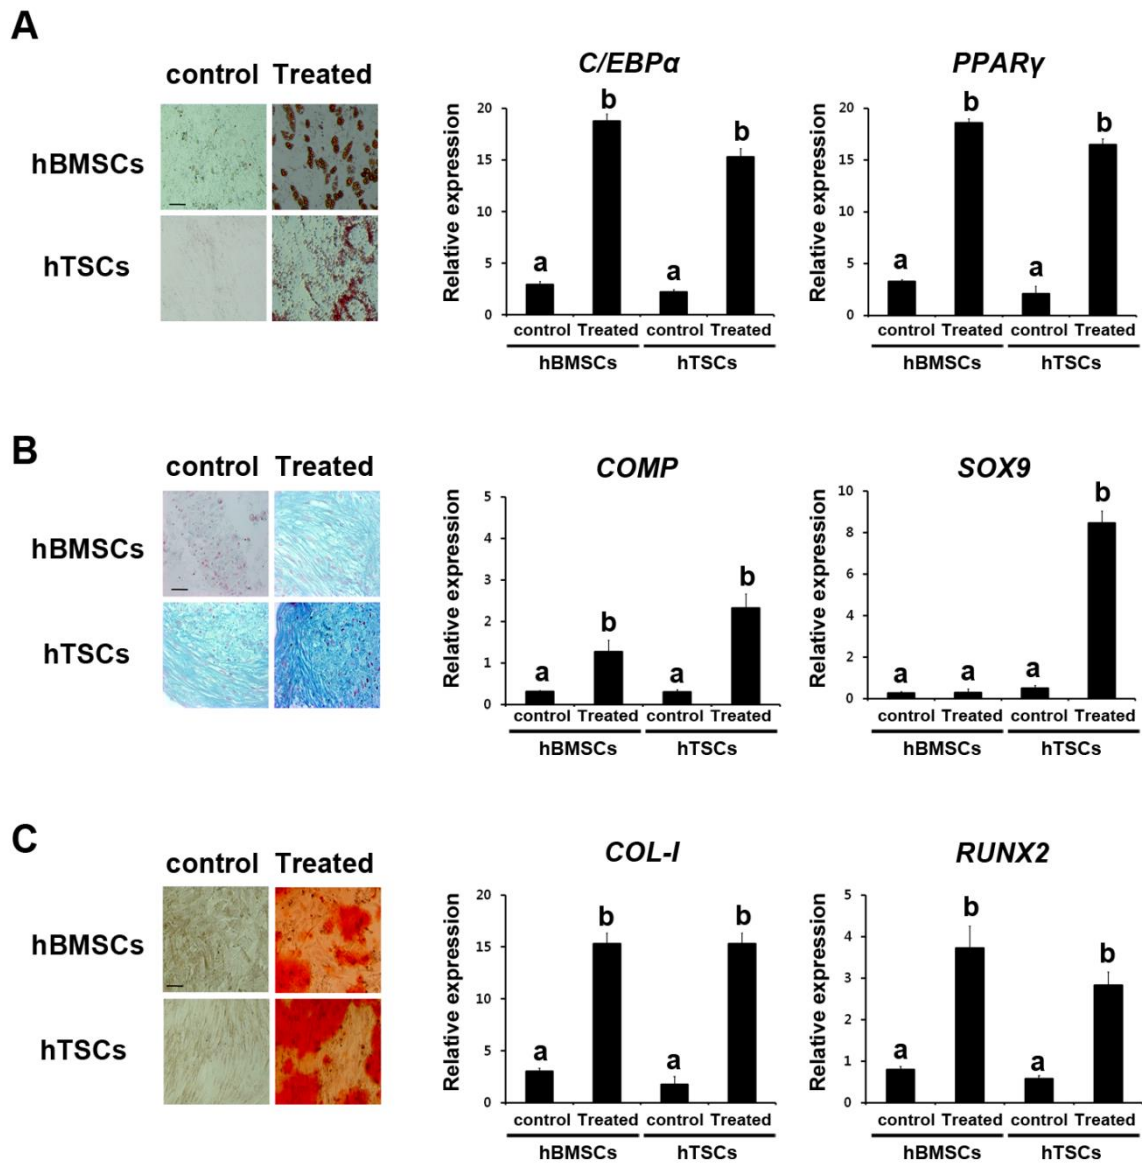

79

80 **Supplementary Figure 3. Characterization of mesodermal differentiation potential in hBMSCs**81 **and hTSCs.** Control cells were stated as control, and differentiation medium treated cells

82 were clared as Treated. (A) Lipid droplets were stained with Oil Red O in hBMSCs and

83 hTSCs. Adipogenesis-specific markers *C/EBPα* and *PPARγ* were examined by real-time

84 PCR. (B) Alcian blue staining was performed with both cell lines for detection of sulfated

85 proteoglycans after chondrogenic differentiation. Chondrogenesis-specific markers, *COMP*86 and *SOX9*, expression level were measured by real-time PCR. (C) Alizarin Red was used

87 to stain calcium deposits in case of osteogenic differentiation, and osteogenesis-specific

88 markers such as *COL-1* and *RUNX2* were used for real-time PCR. Scale bars indicate 10089  $\mu\text{m}$ .

90

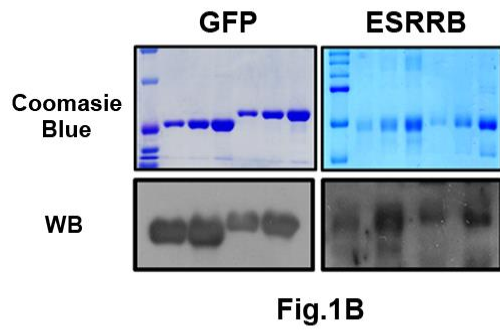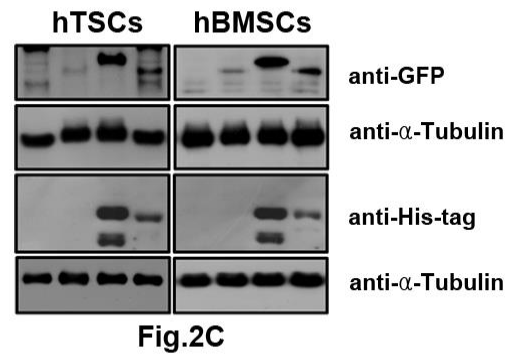

**Supplementary Table 1.** Primer sequences for plasmid construction and PCR.

| Gene           | Purpose     | Sequences |                                   | Annealing  | Product   |
|----------------|-------------|-----------|-----------------------------------|------------|-----------|
|                |             |           |                                   | Temp. (°C) | size (bp) |
| <i>ESRRB</i>   | Cloning     | F:        | 5'-CTCGAGATGTCGTCCGAAGACAGGCAC-3' | 58         | 1,311     |
|                | with CPP    | R:        | 5'-GGATCCCACCTTGGCCTCCAGCATCTC-3' |            |           |
| <i>ESRRB</i>   | Cloning     | F:        | 5'-CATATGTCGTCCGAAGACAGGCACCTG-3' | 58         | 1,308     |
|                | without CPP | R:        | 5'-CTCGAGCACCTTGGCCTCCAGCATCTC-3' |            |           |
| <i>GFP</i>     | Cloning     | F:        | 5'-CTCGAGATGGTGAGCAAGGGCGAGGAG-3' | 58         | 729       |
|                | with CPP    | R:        | 5'-GGATCCCTTGTACAGCTCGTCCATGCC-3' |            |           |
| <i>OCT4</i>    | RT-PCR      | F:        | 5'-AGCGAACCAGTATCGAGAAC-3'        | 60         | 142       |
|                | qRT-PCR     | R:        | 5'-TTACAGAACCACACTCGGAC-3'        |            |           |
| <i>SOX2</i>    | RT-PCR      | F:        | 5'-AGCTACAGCATGATGCAGGA-3'        | 60         | 126       |
|                | qRT-PCR     | R:        | 5'-GGTCATGGAGTTGTACTIONGCA-3'     |            |           |
| <i>NANOG</i>   | RT-PCR      | F:        | 5'-TGAACCTCAGCTACAAACAG-3'        | 60         | 154       |
|                | qRT-PCR     | R:        | 5'-TGGTGGTAGGAAGAGTAAAG-3'        |            |           |
| <i>C/EBPα</i>  | RT-PCR      | F:        | 5'-GCAAACCTACCGCTCCAATG-3'        | 57         | 247       |
|                | qRT-PCR     | R:        | 5'-TTAGGTTCCAAGCCCCAAGTC-3'       |            |           |
| <i>PPARγ</i>   | RT-PCR      | F:        | 5'-TGTCTCATAATGCCATCAGGTTTG-3'    | 57         | 224       |
|                | qRT-PCR     | R:        | 5'-GATAACGAATGGTGATTTGTCTGTT-3'   |            |           |
| <i>COMP</i>    | RT-PCR      | F:        | 5'-AACGCTGAAGTCACGCTCAC-3'        | 60         | 244       |
|                | qRT-PCR     | R:        | 5'-GGTAGCCAAAGATGAAGCCC-3'        |            |           |
| <i>SOX9</i>    | RT-PCR      | F:        | 5'-TTCATGAAGATGACCGACGA-3'        | 60         | 326       |
|                | qRT-PCR     | R:        | 5'-CACACCATGAAGGCGTTCAT-3'        |            |           |
| <i>COL-1</i>   | RT-PCR      | F:        | 5'-AGAACATCACCTACCACTGC-3'        | 57         | 250       |
|                | qRT-PCR     | R:        | 5'-ATGTCCAAAGGTGCAATATC-3'        |            |           |
| <i>RUNX2</i>   | RT-PCR      | F:        | 5'-CCCCACGACAACCGCACCAT-3'        | 61         | 289       |
|                | qRT-PCR     | R:        | 5'-CACTCCGGCCCACAAATCTC-3'        |            |           |
| <i>β-actin</i> | RT-PCR      | F:        | 5'-TGAAGTGTGACGTGGACATC-3'        | 60         | 152       |
|                | qRT-PCR     | R:        | 5'-GGAGGAGCAATGATCTTGAT-3'        |            |           |
